# Supplementary material for: Lung Involvement in Systemic Sclerosis is Associated with Adverse Hospital Outcomes: Insights from the National Inpatient Sample
Source: HighWire-hosted journal article supplement (doi:10.1136/jim-2020-001743), 2021-02-15
Supplement: jim-2020-001743supp001_data_supplement.pdf [file jim-2020-001743supp001_data_supplement.pdf]

Supplementary Table: Used ICD-10 codes

|                                       | ICD-10 codes                                                         |
|---------------------------------------|----------------------------------------------------------------------|
| <b>Diagnosis codes</b>                |                                                                      |
| SSc                                   | M34                                                                  |
| SSc with lung involvement             | M3481                                                                |
| SSc without lung involvement          | All M34 codes, excluding M3481 codes                                 |
| <b>Comorbidities</b>                  |                                                                      |
| Dyslipidemia                          | E78                                                                  |
| Old MI                                | I252                                                                 |
| Atrial fibrillation/flutter           | I48                                                                  |
| Chronic obstructive pulmonary disease | J41, J42, J43, J44                                                   |
| Carotid artery disease                | I652                                                                 |
| Old stroke                            | I63                                                                  |
| Hypertension                          | I10                                                                  |
| Peripheral vascular disease           | I739                                                                 |
| Hypothyroidism                        | E03                                                                  |
| Diabetes Mellitus Type 1&2            | E10, E11                                                             |
| Obesity                               | E660, E6601, E6609, E661, E662, E668, E669                           |
| Congestive heart Failure              | I50                                                                  |
| Chronic Kidney Disease                | N18                                                                  |
| Liver disease                         | K70, K71, K72, K73, K74, K75, K76, K77                               |
| Maintenance dialysis                  | Z992                                                                 |
| Oxygen dependence                     | Z9981                                                                |
| Smoking                               | Z87891, F17200                                                       |
| Anemia                                | D50, D51, D52, D53, D55, D56, D57, D58, D59, D60, D61, D62, D63, D64 |

## Abbreviations:

SSc: Systemic sclerosis, MI: Myocardial infarction, ICD-10: International classification of disease, 10<sup>th</sup> classification
